# Supplementary material for: Inertial Motion Capture-Based Estimation of L5/S1 Moments during Manual Materials Handling
Source: MDPI journal article supplement (doi:10.3390/s22176454), 2022-08-26
Supplement: s1 [file s1]

**Table S1.** Description of MMH tasks configuration and experimental conditions

| <b>Trial</b> | <b>Pace</b> | <b>Di</b> | <b>Locations</b> | <b>Load</b> | <b>Rep</b> | <b>Instructions</b>                                                |
|--------------|-------------|-----------|------------------|-------------|------------|--------------------------------------------------------------------|
| 1            | Free        | 1.5       | D – D            | Box-10      | 4          | No pre- or post-handling                                           |
| 2            | Free        | 1.5       | D – D            | Box-10      | 4          | Pre- and post-handling to move the load closer                     |
| 3            | Free        | 1.5       | D – D            | Box-10      | 4          | Counterbalance with one leg for lifting and deposit                |
| 4            | Free        | 1.5       | L – L            | HBox-10     | 4          | -                                                                  |
| 5            | Free        | 1.5       | L – L            | LBox-10     | 4          | -                                                                  |
| 6            | Free        | 1.5       | L – L            | Bag-20      | 4          | Pre- and post-handling                                             |
| 7            | Free        | 1.5       | L – H            | Box-10      | 8          | Keep the same grip during the entire transfer                      |
| 8            | Free        | 1.5       | L – M            | Box-10      | 4          | Make a stoop for lifting and deposit                               |
| 9            | Free        | 1.5       | L – M            | Box-10      | 4          | Simulate a fragile object                                          |
| 10           | Free        | 1.5       | L – M            | Box-20      | 4          | -                                                                  |
| 11           | Free        | 1.5       | M – M            | Box-2       | 4          | Keep the load away from self                                       |
| 12           | Free        | 1.5       | M – M            | Box-2       | 4          | Keep the load close from self                                      |
| 13           | Free        | 0.75      | L – M            | Box-20      | 8          | -                                                                  |
| 14           | Free        | 0.75      | L – M            | Box-2       | 8          | -                                                                  |
| 15           | Free        | 0.75      | M – H            | Box-10      | 8          | Use the potential energy of the load to reach the deposit location |
| 16           | Free        | 0.75      | L – H            | Box-10      | 8          | Use the potential energy of the load to reach the deposit location |
| 17           | Free        | 0.75      | L – L            | HBox-10     | 4          | No pre- or post-handling                                           |
| 18           | Free        | 0.75      | L – L            | HBox-10     | 4          | Pre- and post-handling                                             |
| 19           | Free        | 0.75      | L – L            | Box-10      | 4          | Grip the load in the width's direction                             |
| 20           | Fast        | 0.75      | L – L            | Box-10      | 4          | Fix the feet and prioritize the back twisting                      |
| 21           | Fast        | 0.75      | L – L            | Box-10      | 4          | Fix the feet and avoid the back twisting                           |
| 22           | Fast        | 0.75      | L – L            | Box-10      | 4          | Fix the feet and delay the weight transfer                         |
| 23           | Fast        | 0.75      | L – L            | Box-10      | 4          | Fix the feet and anticipate the weight transfer                    |
| 24           | Fast        | 0.75      | L – M            | Box-10      | 8          | Use the potential energy of the load to reach the deposit location |
| 25           | Fast        | 0.75      | L – M            | Box-2       | 8          | -                                                                  |
| 26           | Fast        | 0.75      | L – M            | Box-2       | 8          | Linear and constant speed transfer of the load                     |
| 27           | Fast        | 1.5       | L – M            | Box-10      | 4          | Move around and avoid obstacles on the ground                      |
| 28           | Fast        | 1.5       | L – L            | Box-10      | 4          | Release the load towards the deposit location                      |
| 29           | Fast        | 1.5       | L – L            | Box-20      | 4          | Make a squat for lifting and deposit                               |
| 30           | Fast        | 1.5       | L – L            | Box-10      | 4          | Place the feet towards the deposit location when lifting           |
| 31           | Fast        | 1.5       | L – L            | Bag-20      | 4          | No pre-handling                                                    |

“Box-2” refers to the 2 kg-box with handles; “Box-10” refers to the 10-kg box without handles; “Box-20” refers to the 20-kg box without handles; “LBox-10” refers to the large 10-kg box with handles; “Hbox-10” refers to the 10-kg box with handles; “Bag-20” refers to the 20-kg gravel bag.

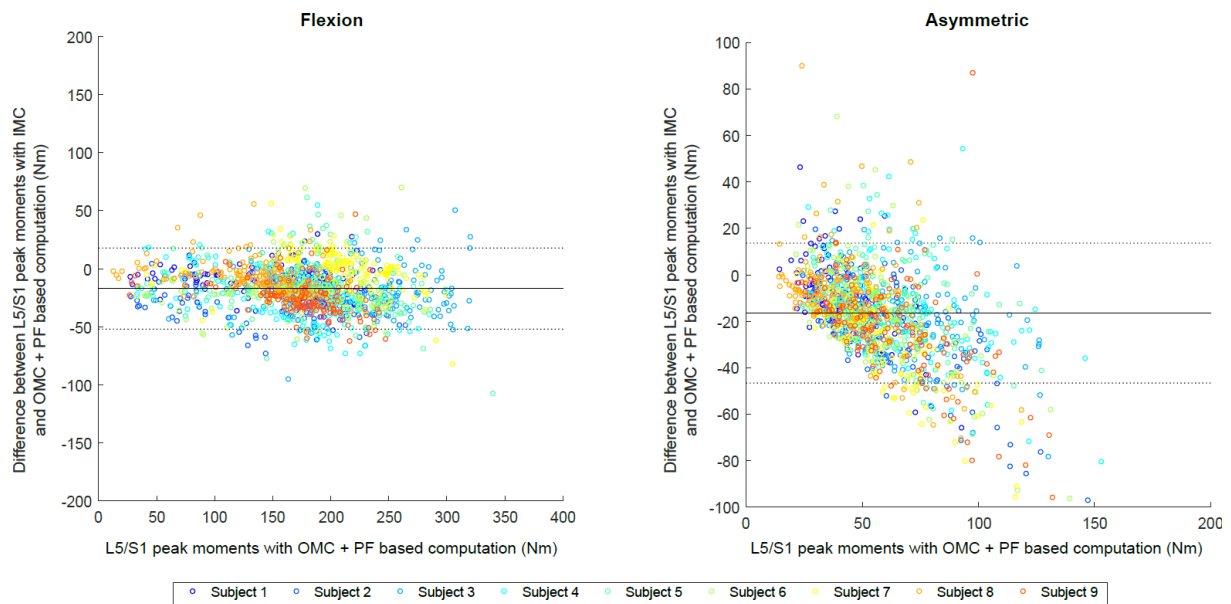

**Figure S1.** Bland-Altman plot between OMC + PF based and IMC based computations of L5/S1 peak moments.

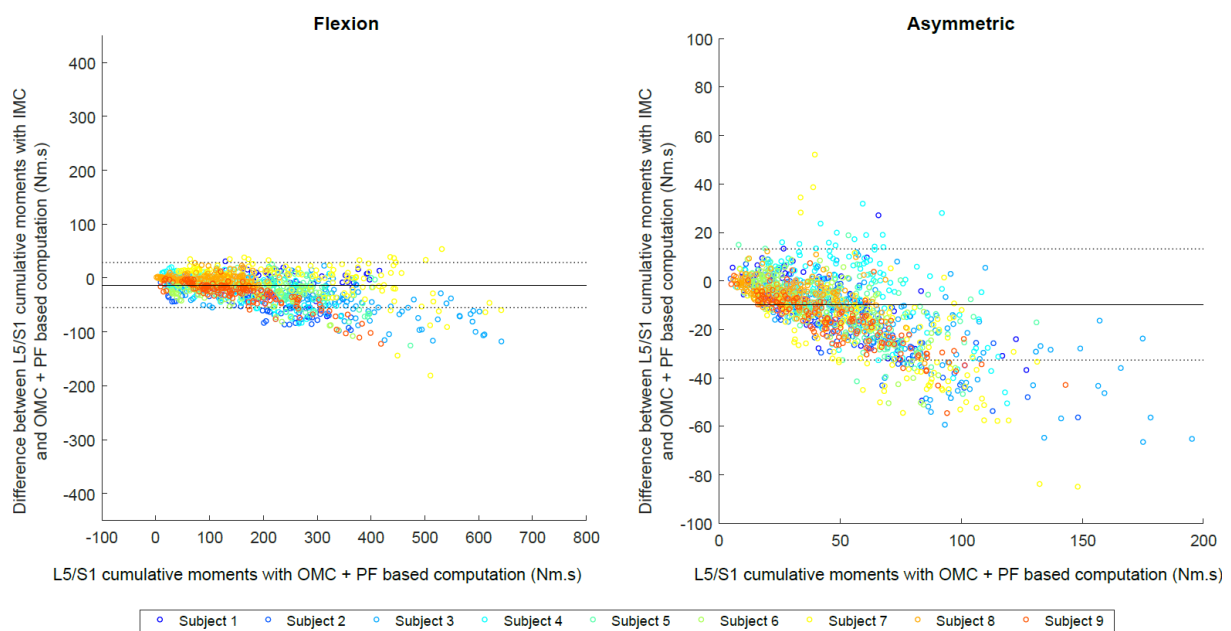

**Figure S2.** Bland-Altman plot between OMC + PF based and IMC based computations of L5/S1 cumulative moments.
